# Supplementary material for: ProBLM Web Server: Protein and Membrane Placement and Orientation Package
Source: Hindawi journal article supplement (doi:10.1155/2014/838259), 2014-01-01
Supplement: f1 [file 838259.f1.pdf]

**Supplementary material:**

**Taylor Kimmett, Nicholas Smith, Shawn Witham, Marharyta Petukh, Subhra Sarkar, Emil Alexov**

**Table 1S. Calculated pKa's of ionizable groups of bacteriorhodopsin with explicit and implicit membrane. pKa predicted to be larger than 14.0 was truncated to 14, while pKa predicted to be smaller than 0.0 was marked as 0.**

| <b>Residue</b> | <b>#</b>   | <b>pKa_experim</b> | <b>Explicit membrane</b> | <b>Implicit membrane</b> |
|----------------|------------|--------------------|--------------------------|--------------------------|
| <b>ARG</b>     | <b>7</b>   |                    | <b>13.648</b>            | <b>13.29</b>             |
| <b>GLU</b>     | <b>9</b>   |                    | <b>10.337</b>            | <b>10.104</b>            |
| <b>TYR</b>     | <b>26</b>  |                    | <b>9.586</b>             | <b>10.379</b>            |
| <b>LYS</b>     | <b>30</b>  |                    | <b>10.128</b>            | <b>9.901</b>             |
| <b>ASP</b>     | <b>36</b>  |                    | <b>1.78</b>              | <b>3.028</b>             |
| <b>ASP</b>     | <b>38</b>  |                    | <b>3.185</b>             | <b>2.001</b>             |
| <b>LYS</b>     | <b>40</b>  |                    | <b>10.135</b>            | <b>14</b>                |
| <b>LYS</b>     | <b>41</b>  |                    | <b>12.583</b>            | <b>13.566</b>            |
| <b>TYR</b>     | <b>43</b>  |                    | <b>14</b>                | <b>14</b>                |
| <b>TYR</b>     | <b>57</b>  |                    | <b>14</b>                | <b>14</b>                |
| <b>TYR</b>     | <b>64</b>  |                    | <b>13.071</b>            | <b>12.968</b>            |
| <b>GLU</b>     | <b>74</b>  |                    | <b>4.33</b>              | <b>4.452</b>             |
| <b>TYR</b>     | <b>79</b>  |                    | <b>14</b>                | <b>14</b>                |
| <b>ARG</b>     | <b>82</b>  | <b>&gt;13.8</b>    | <b>14</b>                | <b>14</b>                |
| <b>TYR</b>     | <b>83</b>  |                    | <b>14</b>                | <b>14</b>                |
| <b>ASP</b>     | <b>85</b>  | <b>2.6</b>         | <b>1.593</b>             | <b>0</b>                 |
| <b>ASP</b>     | <b>96</b>  | <b>&gt;12.0</b>    | <b>14</b>                | <b>14</b>                |
| <b>ASP</b>     | <b>102</b> |                    | <b>5.105</b>             | <b>3.571</b>             |
| <b>ASP</b>     | <b>104</b> |                    | <b>0.836</b>             | <b>1.722</b>             |
| <b>ASP</b>     | <b>115</b> | <b>&gt; 9.5</b>    | <b>9.064</b>             | <b>8.92</b>              |
| <b>LYS</b>     | <b>129</b> |                    | <b>10.93</b>             | <b>10.605</b>            |
| <b>TYR</b>     | <b>131</b> |                    | <b>8.278</b>             | <b>10.73</b>             |
| <b>TYR</b>     | <b>133</b> |                    | <b>10.726</b>            | <b>10.346</b>            |
| <b>ARG</b>     | <b>134</b> |                    | <b>14</b>                | <b>14</b>                |
| <b>TYR</b>     | <b>147</b> |                    | <b>12.459</b>            | <b>12.847</b>            |
| <b>TYR</b>     | <b>150</b> |                    | <b>10.366</b>            | <b>10.251</b>            |
| <b>LYS</b>     | <b>159</b> |                    | <b>12.539</b>            | <b>12.36</b>             |
| <b>GLU</b>     | <b>161</b> |                    | <b>4.078</b>             | <b>3.779</b>             |
| <b>ARG</b>     | <b>164</b> |                    | <b>12.823</b>            | <b>14</b>                |

|            |            |                 |               |               |
|------------|------------|-----------------|---------------|---------------|
| <b>GLU</b> | <b>166</b> |                 | <b>1.98</b>   | <b>8.101</b>  |
| <b>LYS</b> | <b>172</b> |                 | <b>10.553</b> | <b>8.964</b>  |
| <b>ARG</b> | <b>175</b> |                 | <b>11.594</b> | <b>12.436</b> |
| <b>TYR</b> | <b>185</b> |                 | <b>14</b>     | <b>14</b>     |
| <b>GLU</b> | <b>194</b> |                 | <b>0</b>      | <b>0</b>      |
| <b>GLU</b> | <b>204</b> |                 | <b>10.906</b> | <b>13.01</b>  |
| <b>ASP</b> | <b>212</b> | <b>&lt; 2.5</b> | <b>0</b>      | <b>0</b>      |
| <b>LYS</b> | <b>216</b> | <b>&gt;12.0</b> | <b>14</b>     | <b>14</b>     |
| <b>ARG</b> | <b>225</b> |                 | <b>14</b>     | <b>13.339</b> |
| <b>ARG</b> | <b>227</b> |                 | <b>14</b>     | <b>14</b>     |
| <b>GLU</b> | <b>232</b> |                 | <b>3.414</b>  | <b>4.576</b>  |
